# Supplementary material for: DNA-modified Prussian blue nanozymes for enhanced electrochemical biosensing
Source: Royal Society of Chemistry journal article supplement (doi:10.1039/d4nr00387j), 2024-01-01
Supplement: d4nr00387j1.pdf [file d4nr00387j1.pdf]

## Supporting Information

# DNA-Modified Prussian Blue Nanozymes for Enhanced Electrochemical Biosensing

*Lin-Hui Huang<sup>a</sup>, Yu-Yu Hsieh<sup>a</sup>, Fu-An Yang<sup>a</sup>, and Wei-Ching Liao<sup>a,b\*</sup>*

<sup>a</sup>Institute of Biochemistry and Molecular Biology, National Yang Ming Chiao Tung University,  
Taipei 112, Taiwan

<sup>b</sup>Medical Device Innovation and Translation Center, National Yang Ming Chiao Tung University,  
Taipei 112, Taiwan

## Table of Contents

|                                                                                                                                          |    |
|------------------------------------------------------------------------------------------------------------------------------------------|----|
| <b>Table S1.</b> List of DNA sequences used in the study.....                                                                            | 3  |
| <b>Figure S1.</b> SEM images of DNA-PBNPs synthesized with varying ratios of PBNPs to polyT-DNA.....                                     | 4  |
| <b>Figure S2.</b> Catalytic activity of the DNA-PBNPs with different synthesized batches.....                                            | 5  |
| <b>Figure S3.</b> Comparative analysis of catalytic activity between PBNPs and horseradish peroxidase (HRP) at various temperatures..... | 6  |
| <b>Figure S4.</b> Influence of glutathione on the self-cleavage reaction of Cu <sup>2+</sup> -DNAzyme.....                               | 7  |
| <b>Figure S5.</b> Influence of metal ions on the self-cleavage reaction of Cu <sup>2+</sup> -DNAzyme.....                                | 8  |
| <b>Figure S6.</b> Influence of reaction time on self-cleavage the reaction of Cu <sup>2+</sup> -DNAzyme.....                             | 9  |
| <b>Figure S7.</b> Optimization of DNA-PBNPs-based biosensor for VEGF detection.....                                                      | 10 |
| <b>Figure S8.</b> Matrix effect of DNA-PBNPs-based biosensor for VEGF detection.....                                                     | 11 |

**Table S1.** List of DNA sequences used in the study.

| Name                                | Sequences (5'→3')                                                                         |
|-------------------------------------|-------------------------------------------------------------------------------------------|
| polyT-linker                        | 5'-TTTTTTTTTTTTTTTTTTTTTTTTTTGGTTTTTTTTTTTTTTTTTTTTTTT-3'                                 |
| Cu <sup>2+</sup> -DNAzyme           | 5'-GGTTCCTCAGCATCTCTTTCTAATACGACTCAGAATGAGTCTGGGCCTCT<br>TTCTTTTAGAAAGAAC-3'              |
| Product 1 (P <sub>1</sub> )         | 5'-ACTCAGAATGAGTCTGGGCCTCTTTCTTTTAGAAAGAAC-3'                                             |
| Product 2 (P <sub>2</sub> )         | 5'-GGTTCCTCAGCATCTCTTTCTAATACG-3'                                                         |
| SH-Cu <sup>2+</sup> -DNAzyme        | 5'-/5ThioMC6-D/ GGTTCCTCAGCATCTCTTTCTAATACGACTCAGAATGAG<br>TCTGGGCCTCTTTCTTTTAGAAAGAAC-3' |
| Cu <sup>2+</sup> -polyA-capture DNA | 5'-AAAAAAAAAAAAAAAAAAACGTATTAGAAAGAGA-3'                                                  |
| SH-VEGF aptamer (Aptamer1)          | 5'-/5ThioMC6-D/ATGACTAGGTGGGGGTGGACGGGCCGGGTAGA-3'                                        |
| VEGF aptamer (Aptamer2)             | 5'-AAAAAAAAAAAAAAAAAAACAATTGGGCCCGTCCGTATGGTGGGT-3'                                       |

The sequences labeled in blue represent copper ion-dependent DNAzymes, and the triangles indicate the cut sites.

The sequences marked with an underline are complementary.

The sequences labeled in red are crucial for VEGF recognition.

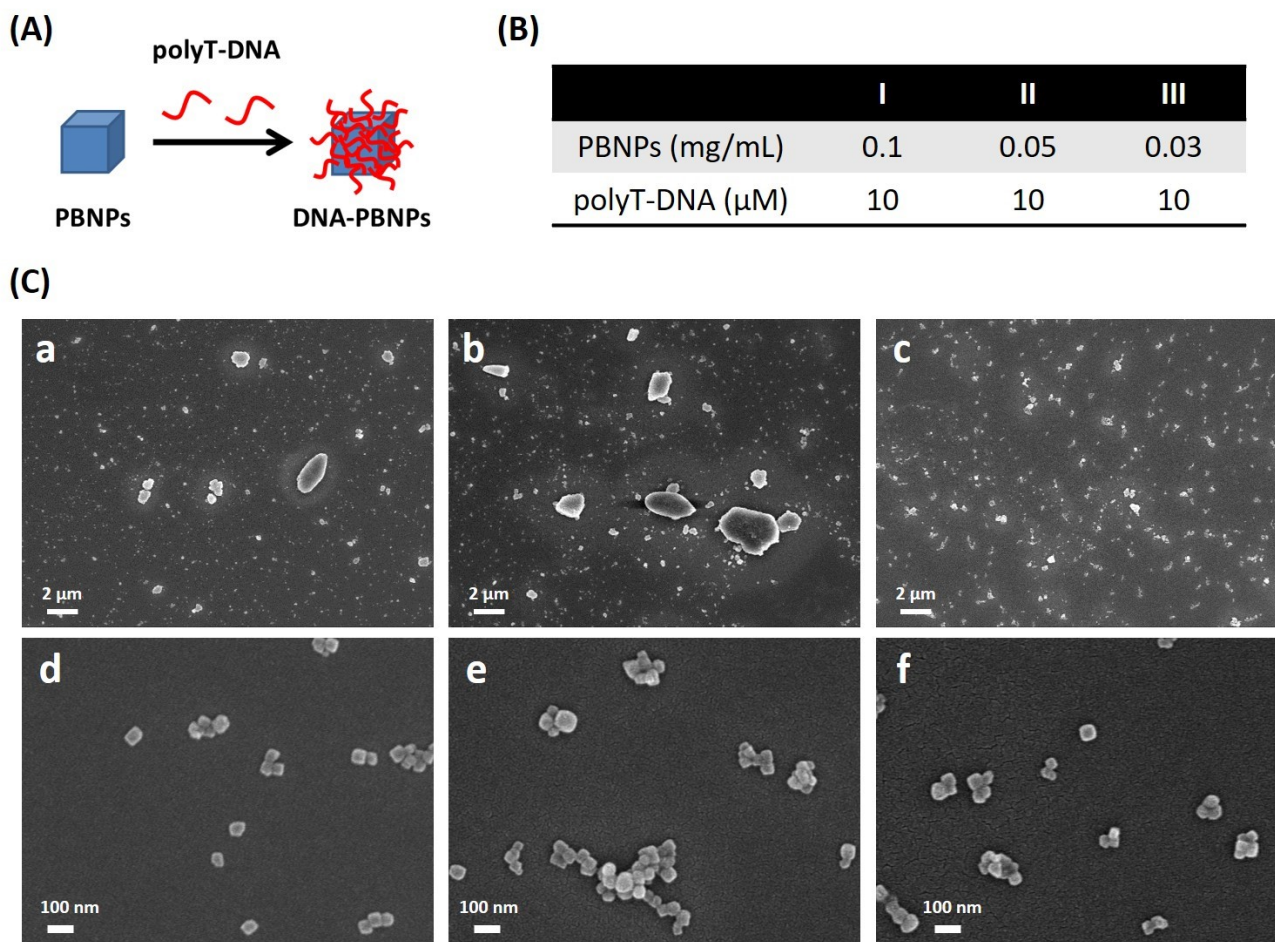

**Figure S1. SEM images of DNA-PBNPs synthesized with varying ratios of PBNPs to polyT-DNA.**

(A) Scheme of DNA-modified PBNPs by DNA adsorption on the porous surface of PBNPs. (B) Table of three concentration ratios of PBNPs to polyT-DNA used in DNA-PBNP synthesis. (C) SEM images of DNA-PBNPs synthesized at different PBNP to polyT-DNA ratios: (a, c) Condition I: 0.1 mg/mL PBNPs and 10  $\mu\text{M}$  polyT-DNA; (b, e) Condition II: 0.05 mg/mL PBNPs and 10  $\mu\text{M}$  polyT-DNA; (c, f) Condition III: 0.03 mg/mL PBNPs and 10  $\mu\text{M}$  polyT-DNA. Scale bar: (a-c) 2  $\mu\text{m}$  and (d-f) 100 nm.

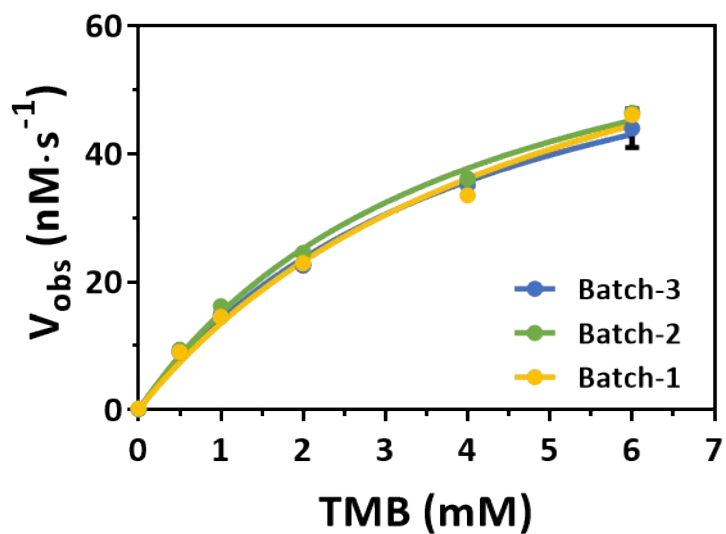

**Figure S2. Catalytic activity of the DNA-PBNPs with different synthesized batches.**

(A) Rates of oxidation of different concentrations of TMB<sub>red</sub> to TMB<sub>ox</sub> by different batch of DNA-PBNPs in the presence of H<sub>2</sub>O<sub>2</sub>. In all experiments, [H<sub>2</sub>O<sub>2</sub>] = 2 mM, [PBNP] or [DNA-PBNPs] = 10 μg mL<sup>-1</sup>.

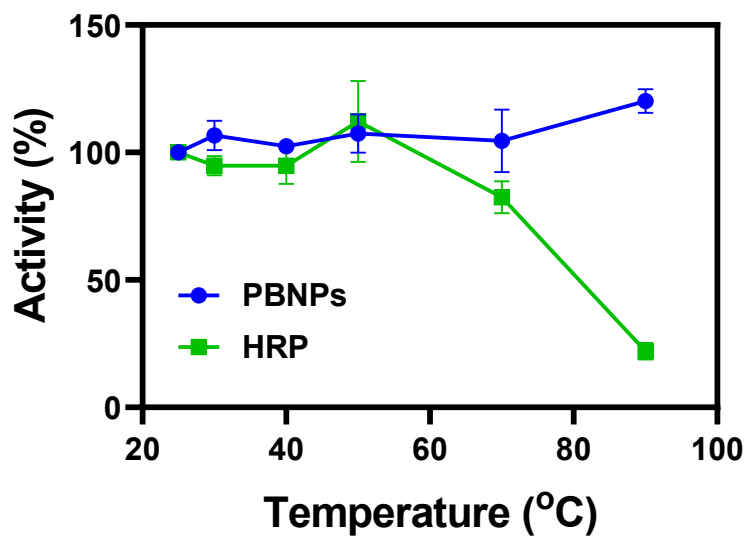

**Figure S3. Comparative analysis of catalytic activity between PBNPs and horseradish peroxidase (HRP) at various temperatures.** After PBNPs and HRP were maintained for 15 minutes at different temperatures, their catalytic activity was tested using K-Blue reagent as the substrate. [PBNP] and [HRP] = 10  $\mu\text{g mL}^{-1}$ .

We examined the impact of glutathione (GSH) on the self-cleavage process of  $\text{Cu}^{2+}$ -DNAzyme using DNA electrophoresis (Figure S3). Gel electrophoresis of the self-cleavage assay showed that the DNA enzyme remained intact in the presence of only GSH or only  $\text{Cu}^{2+}$ . In contrast, when GSH and  $\text{Cu}^{2+}$  coexist, the gel displays cleavage products (P1 and P2). These results revealed that both copper ions and glutathione (GSH) are indispensable for activating the catalytic capability of DNAzyme.

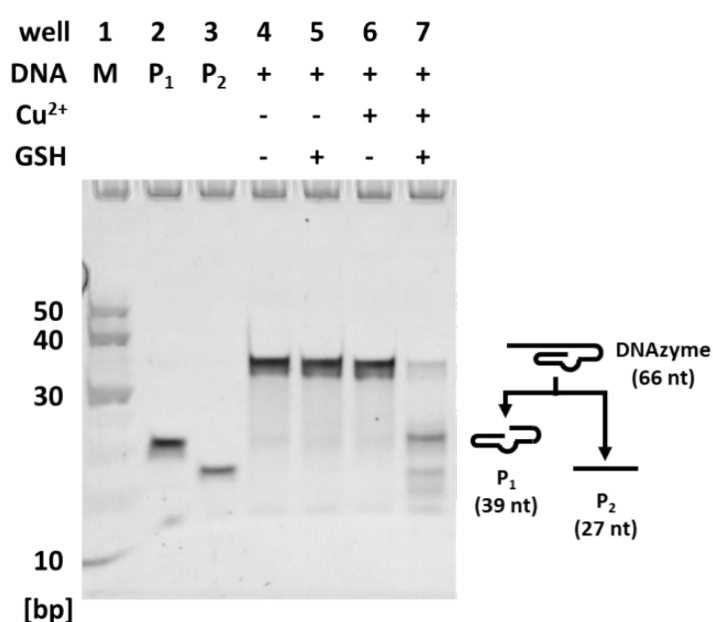

**Figure S4. Influence of glutathione on the self-cleavage reaction of  $\text{Cu}^{2+}$ -DNAzyme.**

M is the DNA ladder; P<sub>1</sub> and P<sub>2</sub> are the product of the self-cleavage reaction of  $\text{Cu}^{2+}$ -DNAzyme. The catalytic assay of  $\text{Cu}^{2+}$ -DNAzyme was performed in a 20  $\mu\text{L}$  reaction mixture containing 0.5  $\mu\text{M}$   $\text{Cu}^{2+}$ -DNAzyme, 50  $\mu\text{M}$   $\text{Cu}^{2+}$ , 50  $\mu\text{M}$  GSH, 0.3 M NaCl, and 50 mM Tris-HCl (pH 7.0). The reaction mixture incubated at room temperature for 1 hour. The experiment was conducted on 12% acrylamide (19:1) denature gel with 1 $\times$  TBE running buffer under 120 V, 50 minutes.

The metal ion selectivity of Cu<sup>2+</sup>-DNAzyme was investigated by different metal ions (Cu<sup>2+</sup>, Mg<sup>2+</sup>, K<sup>+</sup>, Ca<sup>2+</sup>, Fe<sup>3+</sup>, Ni<sup>2+</sup>, and Zn<sup>2+</sup>) in the presence of GSH. Only Cu<sup>2+</sup> efficiently triggered self-cleavage of DNAzyme, resulting the production of cleavage products (P<sub>1</sub> and P<sub>2</sub>). According to the result, this self-cleavage reaction of the Cu<sup>2+</sup>-DNAzyme is specific for Cu<sup>2+</sup>.

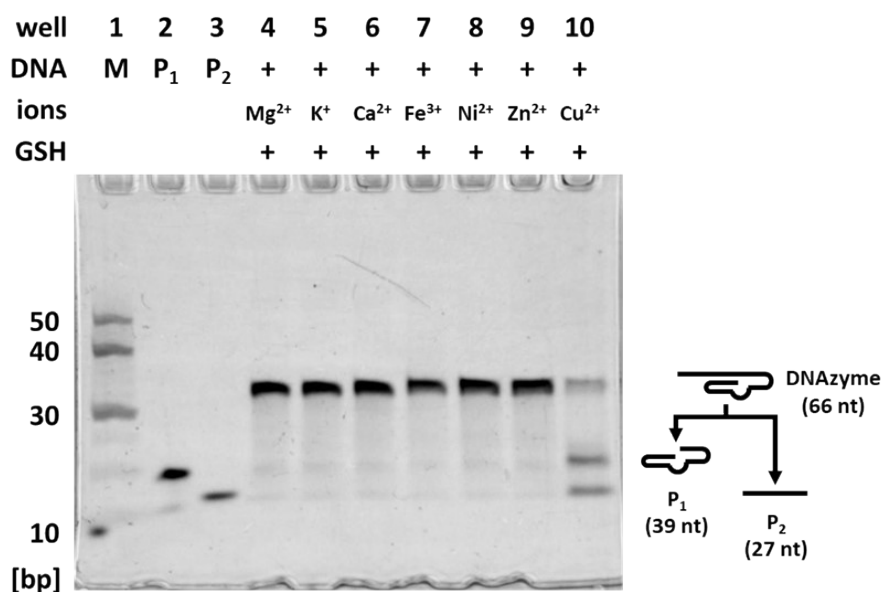

**Figure S5. Influence of metal ions on the self-cleavage reaction of Cu<sup>2+</sup>-DNAzyme.**

M is the DNA ladder; P<sub>1</sub> and P<sub>2</sub> are the product of the self-cleavage reaction of Cu<sup>2+</sup>-DNAzyme. The catalytic assay of Cu<sup>2+</sup>-DNAzyme was performed in a 20 μL reaction mixture containing 0.5 μM Cu<sup>2+</sup>-DNAzyme, 50 μM different metal ions (Mg<sup>2+</sup>, K<sup>+</sup>, Ca<sup>2+</sup>, Fe<sup>3+</sup>, Ni<sup>2+</sup>, Zn<sup>2+</sup>, and Cu<sup>2+</sup>, respectively), 50 μM GSH, 0.3 M NaCl, and 50 mM Tris-HCl (pH 7.0). The reaction mixture was incubated at room temperature for 1 hour. The experiment was conducted on 12% acrylamide (19:1) denature gel with 1× TBE running buffer under 120 V, 55 minutes.



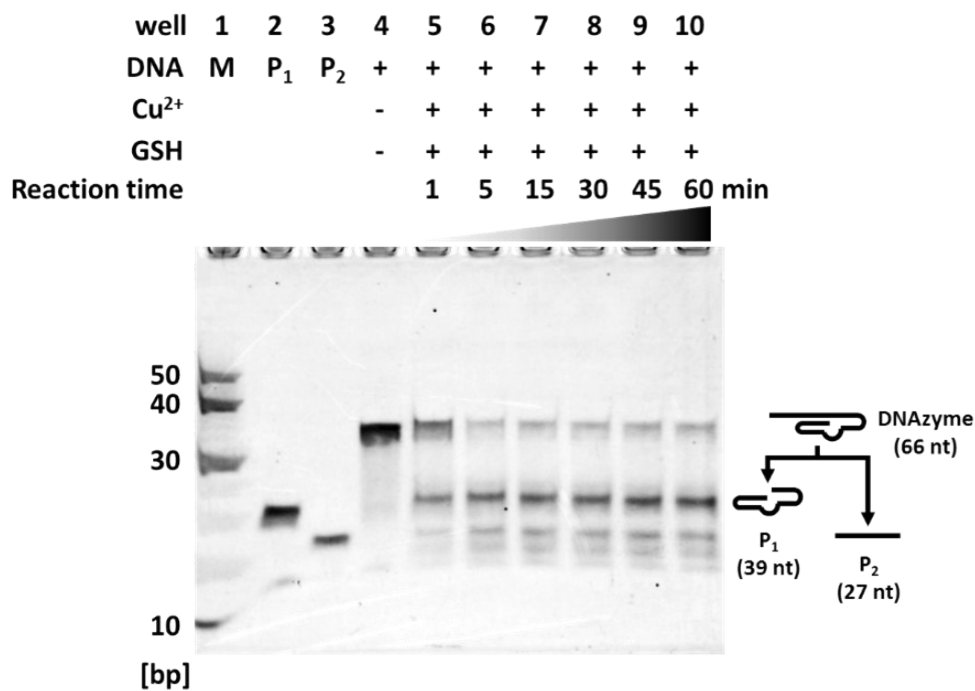

**Figure S6. Influence of reaction time on self-cleavage the reaction of Cu<sup>2+</sup>-DNAzyme.**

M is the DNA ladder; P<sub>1</sub> and P<sub>2</sub> are the product of the self-cleavage reaction of Cu<sup>2+</sup>-DNAzyme. The catalytic assay of Cu<sup>2+</sup>-DNAzyme was performed in a 20 μL reaction mixture containing 0.5 μM Cu<sup>2+</sup>-DNAzyme, 50 μM Cu<sup>2+</sup>, 50 μM GSH, 0.3 M NaCl, and 50 mM Tris-HCl (pH 7.0). The reaction mixture was incubated at room temperature for 1, 5, 15, 30, 45, and 60 minutes, respectively. The reaction mixture was incubated at room temperature for 1 hour. The experiment was conducted on 12% acrylamide (19:1) denature gel with 1× TBE running buffer under 120 V, 55 minutes

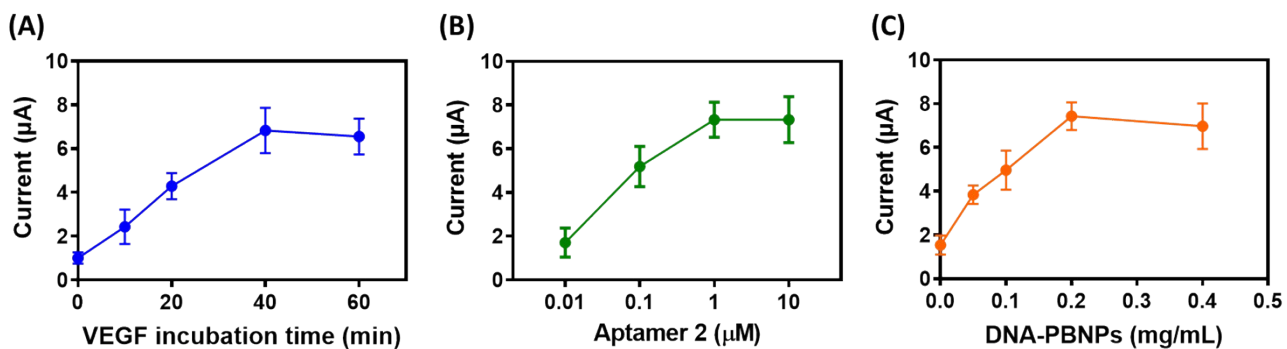

**Figure S7. Optimization of DNA-PBNPs-based biosensor for VEGF detection.**

The effect on the output signal due to varying factors is as follows: (A) the duration of VEGF incubation (ranging from 0 to 60 minutes), (B) the concentrations of Aptamer 2 (ranging from 0.01 to 2 µM), and (C) the concentrations of DNA-PBNPs (ranging from 0 to 0.4 mg/mL). N=3, mean ± SD.

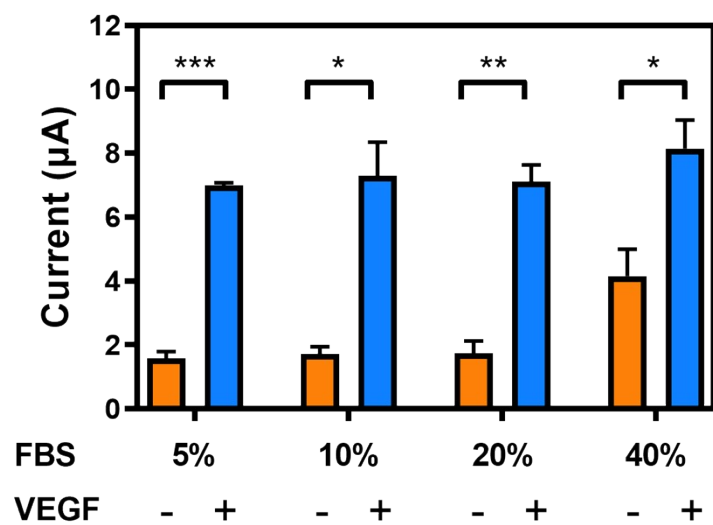

**Figure S8. Matrix effect of DNA-PBNPs-based biosensor for VEGF detection.**

The output signals of the biosensor under various percentages of fetal bovine serum (FBS) in the absence and presence of VEGF (10 ng/mL). (\*:  $P \leq 0.05$ , \*\*:  $P \leq 0.01$ , \*\*\*:  $P \leq 0.001$ )
